# Supplementary material for: Functional Impact of Neuro-Vascular Bundle Preservation in High Risk Prostate Cancer without Compromising Oncological Outcomes: A Propensity-Modelled Analysis
Source: MDPI journal article supplement (doi:10.3390/cancers15245839), 2023-12-14
Supplement: s1 [file s1]

## Supplemental Material

Supplemental Table S1a: Functional outcomes in patients with uni- vs. bilateral NS-RP before and after IPTW

|                            | Before IPTW   |              |        |         | After IPTW    |              |        |         |
|----------------------------|---------------|--------------|--------|---------|---------------|--------------|--------|---------|
|                            | Unilateral NS | Bilateral NS | diff   | P-value | Unilateral NS | Bilateral NS | diff   | P-value |
| Number of patients         | 516           | 666          |        |         | 516           | 666          |        |         |
| <b>Complete EFR, n (%)</b> |               |              |        |         |               |              |        |         |
| 3 months                   | 13 (3)        | 46 (7)       | -0.210 | 0.001   | 14 (3)        | 46 (7)       | -0.196 | 0.003   |
| 6 months                   | 36 (7)        | 85 (13)      | -0.197 | 0.001   | 36 (7)        | 83 (13)      | -0.186 | 0.003   |
| 12 months                  | 54 (10)       | 134 (20)     | -0.271 | <0.001  | 53 (10)       | 129 (19)     | -0.258 | <0.001  |
| 24 months                  | 70 (14)       | 179 (27)     | -0.334 | <0.001  | 68 (13)       | 172 (26)     | -0.324 | <0.001  |
| <b>EFR, n (%)</b>          |               |              |        |         |               |              |        |         |
| 3 months                   | 53 (10)       | 141 (21)     | -0.302 | <0.001  | 52 (10)       | 137 (21)     | -0.292 | <0.001  |
| 6 months                   | 113 (22)      | 247 (37)     | -0.336 | <0.001  | 115 (22)      | 242 (36)     | -0.314 | <0.001  |
| 12 months                  | 188 (36)      | 344 (52)     | -0.310 | <0.001  | 193 (37)      | 334 (50)     | -0.261 | <0.001  |
| 24 months                  | 207 (40)      | 378 (57)     | -0.339 | <0.001  | 209 (40)      | 367 (55)     | -0.296 | <0.001  |
| <b>Continence, n (%)</b>   |               |              |        |         |               |              |        |         |
| 3 months                   | 430 (83)      | 572 (86)     | -0.074 | 0.210   | 431 (84)      | 572 (86)     | -0.064 | 0.287   |
| 6 months                   | 462 (89)      | 619 (93)     | -0.120 | 0.044   | 462 (90)      | 618 (93)     | -0.116 | 0.057   |
| 12 months                  | 489 (95)      | 638 (96)     | -0.045 | 0.459   | 490 (95)      | 637 (96)     | -0.033 | 0.601   |
| 24 months                  | 501 (97)      | 646 (97)     | 0.008  | 0.896   | 502 (97)      | 645 (97)     | 0.022  | 0.741   |
| <b>Aid, n (%)</b>          |               |              |        |         |               |              |        |         |
| <u>3 months</u>            |               |              |        | <0.001  |               |              |        | <0.001  |
| no aid                     | 19 (4)        | 53 (8)       | 0.185  |         | 19 (4)        | 53 (8)       | 0.182  |         |
| oral PDE-5 inhibitors      | 24 (5)        | 76 (11)      | 0.248  |         | 24 (5)        | 74 (11)      | 0.243  |         |
| non-oral (MUSE+ISI)        | 17 (3)        | 18 (3)       | -0.034 |         | 16 (3)        | 17 (3)       | -0.033 |         |
| erectile dysfunction       | 456 (88)      | 519 (78)     | -0.281 |         | 457 (89)      | 522 (78)     | -0.278 |         |
| <u>6 months</u>            |               |              |        | <0.001  |               |              |        | <0.001  |
| no aid                     | 40 (8)        | 90 (14)      | 0.190  |         | 39 (8)        | 89 (13)      | 0.187  |         |
| oral PDE-5 inhibitors      | 40 (8)        | 118 (18)     | 0.303  |         | 41 (8)        | 114 (17)     | 0.283  |         |
| non-oral (MUSE+ISI)        | 39 (7)        | 45 (7)       | -0.029 |         | 39 (8)        | 45 (7)       | -0.028 |         |
| erectile dysfunction       | 398 (77)      | 413 (62)     | -0.332 |         | 397 (77)      | 417 (63)     | -0.315 |         |
| <u>12 months</u>           |               |              |        | <0.001  |               |              |        | <0.001  |
| no aid                     | 56 (11)       | 135 (20)     | 0.263  |         | 54 (11)       | 131 (20)     | 0.256  |         |
| oral PDE-5 inhibitors      | 63 (12)       | 150 (22)     | 0.274  |         | 66 (13)       | 146 (22)     | 0.241  |         |
| non-oral (MUSE+ISI)        | 72 (14)       | 63 (9)       | -0.144 |         | 75 (15)       | 62 (9)       | -0.160 |         |
| erectile dysfunction       | 325 (63)      | 319 (48)     | -0.307 |         | 320 (62)      | 327 (49)     | -0.263 |         |
| <u>24 months</u>           |               |              |        | <0.001  |               |              |        | <0.001  |
| no aid                     | 70 (14)       | 182 (27)     | 0.342  |         | 68 (13)       | 175 (26)     | 0.335  |         |
| oral PDE-5 inhibitors      | 59 (12)       | 134 (20)     | 0.238  |         | 62 (12)       | 129 (19)     | 0.204  |         |
| non-oral (MUSE+ISI)        | 78 (15)       | 65 (10)      | -0.165 |         | 80 (16)       | 65 (10)      | -0.175 |         |
| erectile dysfunction       | 308 (60)      | 286 (43)     | -0.341 |         | 306 (59)      | 296 (44)     | -0.298 |         |

NS-RP, nerve sparing radical prostatectomy; IPTW, EFR, erectile function recovery; PDE-5, Phosphodiesterase 5; MUSE, medicated urethral system for erection; ISI, intracavernous self-injection with prostaglandin

**Supplemental Table S1b: Functional outcomes in all 1340 patients undergoing no vs. uni- vs. bilateral RP for prostate cancer**

|                                   | No NS    | Unilateral NS | Bilateral NS | P-value |
|-----------------------------------|----------|---------------|--------------|---------|
| Number of patients                | 158      | 516           | 666          |         |
| <b><i>Complete EFR, n (%)</i></b> |          |               |              |         |
| 3 months                          | 1 (0.63) | 13 (2.5)      | 46 (7.0)     | <0.001  |
| 6 months                          | 1 (0.64) | 35 (6.9)      | 83 (13)      | <0.001  |
| 12 months                         | 1 (0.67) | 52 (10)       | 124 (20)     | <0.001  |
| 24 months                         | 3 (2.2)  | 64 (14)       | 155 (27)     | <0.001  |
| <b><i>EFR, n (%)</i></b>          |          |               |              |         |
| 3 months                          | 6 (3.8)  | 53 (10)       | 140 (21)     | <0.001  |
| 6 months                          | 18 (11)  | 111 (22)      | 241 (37)     | <0.001  |
| 12 months                         | 25 (17)  | 182 (36)      | 319 (52)     | <0.001  |
| 24 months                         | 25 (19)  | 188 (40)      | 327 (57)     | <0.001  |
| <b><i>Continence, n (%)</i></b>   |          |               |              |         |
| 3 months                          | 99 (65)  | 423 (83)      | 569 (86)     | <0.001  |
| 6 months                          | 110 (74) | 443 (89)      | 602 (93)     | <0.001  |
| 12 months                         | 114 (82) | 454 (95)      | 586 (96)     | <0.001  |
| 24 months                         | 104 (84) | 432 (97)      | 540 (97)     | <0.001  |
| <b><i>Aid, n (%)</i></b>          |          |               |              | <0.001  |
| <u>3 months</u>                   |          |               |              |         |
| no aid                            | 2 (1.3)  | 13 (2.5)      | 49 (7.4)     |         |
| oral PDE-5 inhibitors             | 2 (1.3)  | 24 (4.7)      | 75 (11)      |         |
| non-oral (MUSE+ISI)               | 2 (1.3)  | 17 (3.3)      | 18 (2.7)     |         |
| erectile dysfunction              | 152 (96) | 460 (89)      | 519 (79)     |         |
| <u>6 months</u>                   |          |               |              | <0.001  |
| no aid                            | 4 (2.5)  | 39 (7.7)      | 89 (14)      |         |
| oral PDE-5 inhibitors             | 10 (6.4) | 39 (7.7)      | 114 (18)     |         |
| non-oral (MUSE+ISI)               | 7 (4.5)  | 38 (7.5)      | 44 (6.8)     |         |
| erectile dysfunction              | 136 (87) | 391 (77)      | 404 (62)     |         |
| <u>12 months</u>                  |          |               |              | <0.001  |
| no aid                            | 4 (2.5)  | 54 (10)       | 125 (19)     |         |
| oral PDE-5 inhibitors             | 9 (5.7)  | 61 (12)       | 139 (21)     |         |
| non-oral (MUSE+ISI)               | 15 (9.5) | 70 (14)       | 58 (8.7)     |         |
| erectile dysfunction              | 122 (77) | 315 (61)      | 296 (44)     |         |
| <u>24 months</u>                  |          |               |              | <0.001  |
| no aid                            | 6 (3.8)  | 64 (12)       | 157 (24)     |         |
| oral PDE-5 inhibitors             | 10 (6.3) | 54 (10)       | 116 (17)     |         |
| non-oral (MUSE+ISI)               | 13 (8.2) | 71 (14)       | 56 (8.4)     |         |
| erectile dysfunction              | 106 (67) | 280 (54)      | 247 (37)     |         |

NS-RP, nerve sparing radical prostatectomy; EFR, erectile function recovery; PDE-5, Phosphodiesterase 5; MUSE, medicated urethral system for erection; ISI, intracavernous self-injection with prostaglandin

## Supplemental Table S2: Postoperative complications

Supplemental Table S2a: Morbidity expressed with the Bern CCI after 30d and 90d

|                      | No NS        | Unilateral NS | Bilateral NS | P-value |
|----------------------|--------------|---------------|--------------|---------|
| Number of patients   | 158          | 516           | 666          |         |
| Berne CCI (30 days)* | 19 [15 - 22] | 22 [15 - 24]  | 22 [15 - 22] | 0.66    |
| Berne CCI (90 days)* | 22 [15 - 27] | 22 [15 - 34]  | 22 [15 - 33] | 0.67    |

*\*only patients who experienced a complication*

Supplemental Table S2b: Numbers of complications according to the Clavien-Dindo Classification (CDC) after 90 days

| Clavien-Dindo Grades | No NS   | Unilateral NS | Bilateral NS | P-value |
|----------------------|---------|---------------|--------------|---------|
| CDC 1, n (%)         | 16 (10) | 32 (6)        | 57 (9)       | 0.17    |
| CDC 2, n (%)         | 19 (12) | 56 (11)       | 82 (12)      | 0.73    |
| CDC 3a, n (%)        | 26 (16) | 84 (16)       | 133 (20)     | 0.2     |
| CDC 3b, n (%)        | 2 (1)   | 14 (3)        | 17 (3)       | 0.58    |
| CDC 4a, n (%)        | 0       | 3 (1)         | 3 (0.5)      | 0.63    |
| CDC 4b, n (%)        | 0       | 0             | 0            | -       |
| CDC 5, n (%)         | 0       | 0             | 0            | -       |

CCI, Comprehensive Complication Index; NS, nerve sparing; CDC, Clavien-Dindo Classification

Supplemental Table S2c: Numbers of surgical complications after 90 days in all 1340 patients undergoing pelvic lymph node dissection

|                                        | No NS    | Unilateral NS | Bilateral NS | P-value |
|----------------------------------------|----------|---------------|--------------|---------|
| Number of patients                     | 158      | 516           | 666          |         |
| Lymphocele (with and without drainage) | 19 (12)  | 60 (12)       | 104 (16)     | 0.12    |
| Lymphocele (with need for drainage)    | 14 (8.9) | 41 (7.9)      | 76 (11)      | 0.13    |
| Symptomatic lymphedema                 | 7 (4.4)  | 10 (1.9)      | 19 (2.9)     | 0.21    |
| Neurapraxia (obturator nerve)          | 8 (5.1)  | 18 (3.5)      | 32 (4.8)     | 0.46    |
| Deep venous thrombosis                 | 0 (0.00) | 12 (2.3)      | 17 (2.6)     | 0.09    |
| Pulmonary embolism                     | 2 (1.3)  | 5 (0.97)      | 7 (1.1)      | 0.86    |

Supplemental Table S3: Probability of oncological outcome per treatment group at given time points

Table S3a: All-cause death

| Years since RP | Entire Cohort   | No NS          | Uni NS          | Bi NS           |
|----------------|-----------------|----------------|-----------------|-----------------|
| 1              | 100             | 100            | 100             | 100             |
| 2              | 100 (99 to 100) | 100            | 100 (99 to 100) | 100 (99 to 100) |
| 3              | 99 (99 to 100)  | 99 (94 to 100) | 99 (98 to 100)  | 99 (98 to 100)  |
| 4              | 99 (98 to 99)   | 97 (92 to 99)  | 98 (96 to 99)   | 99 (98 to 100)  |
| 5              | 97 (96 to 98)   | 90 (84 to 94)  | 96 (94 to 98)   | 99 (98 to 100)  |
| 6              | 97 (95 to 98)   | 90 (84 to 94)  | 96 (93 to 97)   | 99 (98 to 100)  |
| 7              | 96 (95 to 97)   | 90 (84 to 94)  | 94 (92 to 96)   | 99 (98 to 100)  |
| 8              | 96 (94 to 97)   | 90 (84 to 94)  | 94 (91 to 96)   | 98 (97 to 99)   |
| 9              | 95 (94 to 96)   | 88 (81 to 93)  | 93 (90 to 95)   | 98 (97 to 99)   |
| 10             | 94 (92 to 95)   | 85 (77 to 91)  | 92 (89 to 95)   | 98 (96 to 99)   |
| 11             | 94 (92 to 95)   | 84 (76 to 90)  | 92 (89 to 94)   | 98 (95 to 99)   |
| 12             | 92 (90 to 94)   | 83 (74 to 89)  | 91 (87 to 93)   | 97 (94 to 98)   |

Table S3b: Cancer-specific death

| Years since RP | Entire Cohort   | No NS          | Uni NS          | Bi NS           |
|----------------|-----------------|----------------|-----------------|-----------------|
| 1              | 100             | 100            | 100             | 100             |
| 2              | 100 (99 to 100) | 100            | 100 (99 to 100) | 100 (99 to 100) |
| 3              | 99 (99 to 100)  | 99 (94 to 100) | 99 (98 to 100)  | 99 (98 to 100)  |
| 4              | 99 (98 to 99)   | 97 (92 to 99)  | 98 (96 to 99)   | 99 (98 to 100)  |
| 5              | 97 (96 to 98)   | 90 (84 to 94)  | 96 (94 to 98)   | 99 (98 to 100)  |
| 6              | 97 (95 to 98)   | 90 (84 to 94)  | 96 (93 to 97)   | 99 (98 to 100)  |
| 7              | 96 (95 to 97)   | 90 (84 to 94)  | 94 (92 to 96)   | 99 (98 to 100)  |
| 8              | 96 (94 to 97)   | 90 (84 to 94)  | 94 (91 to 96)   | 98 (97 to 99)   |
| 9              | 95 (94 to 96)   | 88 (81 to 93)  | 93 (90 to 95)   | 98 (97 to 99)   |
| 10             | 94 (92 to 95)   | 85 (77 to 91)  | 92 (89 to 95)   | 98 (96 to 99)   |
| 11             | 94 (92 to 95)   | 84 (76 to 90)  | 92 (89 to 94)   | 98 (95 to 99)   |
| 12             | 92 (90 to 94)   | 83 (74 to 89)  | 91 (87 to 93)   | 97 (94 to 98)   |

Table S3c: Other cause death

| Years since RP | Entire Cohort   | No NS          | Uni NS          | Bi NS           |
|----------------|-----------------|----------------|-----------------|-----------------|
| 1              | 100             | 100            | 100             | 100             |
| 2              | 100 (99 to 100) | 100            | 100 (99 to 100) | 100 (99 to 100) |
| 3              | 99 (99 to 100)  | 99 (94 to 100) | 99 (98 to 100)  | 99 (98 to 100)  |
| 4              | 99 (98 to 99)   | 97 (92 to 99)  | 98 (96 to 99)   | 99 (98 to 100)  |
| 5              | 97 (96 to 98)   | 90 (84 to 94)  | 96 (94 to 98)   | 99 (98 to 100)  |
| 6              | 97 (95 to 98)   | 90 (84 to 94)  | 96 (93 to 97)   | 99 (98 to 100)  |
| 7              | 96 (95 to 97)   | 90 (84 to 94)  | 94 (92 to 96)   | 99 (98 to 100)  |
| 8              | 96 (94 to 97)   | 90 (84 to 94)  | 94 (91 to 96)   | 98 (97 to 99)   |
| 9              | 95 (94 to 96)   | 88 (81 to 93)  | 93 (90 to 95)   | 98 (97 to 99)   |
| 10             | 94 (92 to 95)   | 85 (77 to 91)  | 92 (89 to 95)   | 98 (96 to 99)   |
| 11             | 94 (92 to 95)   | 84 (76 to 90)  | 92 (89 to 94)   | 98 (95 to 99)   |
| 12             | 92 (90 to 94)   | 83 (74 to 89)  | 91 (87 to 93)   | 97 (94 to 98)   |

Table S3d: Any recurrence

| Years since RP | Entire Cohort   | No NS          | Uni NS          | Bi NS           |
|----------------|-----------------|----------------|-----------------|-----------------|
| 1              | 100             | 100            | 100             | 100             |
| 2              | 100 (99 to 100) | 100            | 100 (99 to 100) | 100 (99 to 100) |
| 3              | 99 (99 to 100)  | 99 (94 to 100) | 99 (98 to 100)  | 99 (98 to 100)  |
| 4              | 99 (98 to 99)   | 97 (92 to 99)  | 98 (96 to 99)   | 99 (98 to 100)  |
| 5              | 97 (96 to 98)   | 90 (84 to 94)  | 96 (94 to 98)   | 99 (98 to 100)  |
| 6              | 97 (95 to 98)   | 90 (84 to 94)  | 96 (93 to 97)   | 99 (98 to 100)  |
| 7              | 96 (95 to 97)   | 90 (84 to 94)  | 94 (92 to 96)   | 99 (98 to 100)  |
| 8              | 96 (94 to 97)   | 90 (84 to 94)  | 94 (91 to 96)   | 98 (97 to 99)   |
| 9              | 95 (94 to 96)   | 88 (81 to 93)  | 93 (90 to 95)   | 98 (97 to 99)   |
| 10             | 94 (92 to 95)   | 85 (77 to 91)  | 92 (89 to 95)   | 98 (96 to 99)   |
| 11             | 94 (92 to 95)   | 84 (76 to 90)  | 92 (89 to 94)   | 98 (95 to 99)   |
| 12             | 92 (90 to 94)   | 83 (74 to 89)  | 91 (87 to 93)   | 97 (94 to 98)   |
